# Supplementary material for: Prevalence of Helicobacter pylori and Its Associated Factors among Healthy Asymptomatic Residents in the United Arab Emirates
Source: MDPI journal article supplement (doi:10.3390/pathogens8020044), 2019-04-01
Supplement: s1 [file s1]

## Prevalence of *H. pylori* and its associated risk factors

The aim of this questionnaire is to study the prevalence of *H. pylori* and its associated risk factors. The study will help enormously in the prevention and treatment of the severe gastric diseases caused by *H. pylori* infection. The study will be conducted by Dr. Ghalia Khoder, assistant professor at College of Pharmacy, University of Sharjah. To perform the study, we require from you as volunteer a stool sample and the below filled questionnaire.

Do you accept to participate as a volunteer in this study ? Yes ☐ No ☐

1. Sex : Female ☐ Male ☐

2. Age : \_\_\_\_\_ years or \_\_\_\_\_ months (for baby)

3. Nationality : \_\_\_\_\_

4. Weight : \_\_\_\_\_ kg and height \_\_\_\_\_ m

5. Profession : \_\_\_\_\_

6. Place of residency: Abu Dhabi ☐ Dubai ☐ Sharjah ☐ RAK ☐ Ajman ☐ Fujairah ☐ Umm al Quwain ☐

7. Marital status : Not married ☐ Married ☐ Widow ☐ Divorced ☐

8. Education level : No formal education ☐ Primary ☐ Secondary ☐ University ☐

9. Smoking history:

|           | Yes                      | No                       |
|-----------|--------------------------|--------------------------|
| Cigarette | <input type="checkbox"/> | <input type="checkbox"/> |
| Shisha    | <input type="checkbox"/> | <input type="checkbox"/> |

In case you are smoking shisha, do you share with others the same shisha's accessories ? Yes ☐ No ☐

10. Total family income:

- ☐ Less than 5 000 AED /family
- ☐ 5 000 – 10 000 AED / family
- ☐ 10 000- 20 000 AED / family
- ☐ 20 000 -30 000 AED /family
- ☐ More than 30 000 AED /family
- ☐ No family income

**11. Number of family members per house:**

| 1-3                  | 4-6                  | 7-9                  | More than 10         |
|----------------------|----------------------|----------------------|----------------------|
| <input type="text"/> | <input type="text"/> | <input type="text"/> | <input type="text"/> |

**12. Number of rooms per house :**

1 room      2 rooms      3 rooms      More than 3 rooms

☐      ☐      ☐      ☐

**13. Number of family members per room :**

|                          |                          |                          |                          |                          |
|--------------------------|--------------------------|--------------------------|--------------------------|--------------------------|
| 1                        | 2                        | 3                        | 4                        | More than 4              |
| <input type="checkbox"/> |

**14.** Do you have contact with any domestic animals? Yes ☐ No ☐

If your answer is yes, which type of domestic animals do you usually contact ?

[illegible]

**15. Do you suffer from any of the below listed diseases?**

|                | Yes                      | No                       | Not sure                 |
|----------------|--------------------------|--------------------------|--------------------------|
| Diabetes       | <input type="checkbox"/> | <input type="checkbox"/> | <input type="checkbox"/> |
| Hypertension   | <input type="checkbox"/> | <input type="checkbox"/> | <input type="checkbox"/> |
| Anemia         | <input type="checkbox"/> | <input type="checkbox"/> | <input type="checkbox"/> |
| Asthma         | <input type="checkbox"/> | <input type="checkbox"/> | <input type="checkbox"/> |
| Kidney failure | <input type="checkbox"/> | <input type="checkbox"/> | <input type="checkbox"/> |
| cancer         | <input type="checkbox"/> | <input type="checkbox"/> | <input type="checkbox"/> |

**16. What is your frequent source of drinking water ?**

Tap water      Mineral bottled water      Boiled water      Well

**17. How often are you eating the below nutritional products ?**

|                  | Never / Rarely           | Sometimes/ often         |
|------------------|--------------------------|--------------------------|
| Poultry products | <input type="checkbox"/> | <input type="checkbox"/> |
| Raw vegetables   | <input type="checkbox"/> | <input type="checkbox"/> |
| Fish products    | <input type="checkbox"/> | <input type="checkbox"/> |
| Raw meat         | <input type="checkbox"/> | <input type="checkbox"/> |

**18.** Do you suffer from any gastrointestinal pain ? Yes ☐ No ☐

If your answer is yes, from which of the below gastrointestinal pain are you suffering frequently ?

Blotting      Nausea      Vomiting      Abdominal pain      Burning sensation      others

19. Did any of your parents suffer from severe gastric diseases ? Yes ☐ No ☐

If your answer is yes, from which gastric diseases have they suffered ?

|                          |                          |                          |                          |
|--------------------------|--------------------------|--------------------------|--------------------------|
| Peptic ulcer             | Gastric cancer           | MALT lymphoma            | Other gastric diseases   |
| <input type="checkbox"/> | <input type="checkbox"/> | <input type="checkbox"/> | <input type="checkbox"/> |

20. How often are you using the following drugs ?

|                       | Never / Rarely           | Sometimes/ often         |
|-----------------------|--------------------------|--------------------------|
| Vitamin               | <input type="checkbox"/> | <input type="checkbox"/> |
| Aspirin               | <input type="checkbox"/> | <input type="checkbox"/> |
| Panadol/Paracetmol    | <input type="checkbox"/> | <input type="checkbox"/> |
| Proton Pump inhibitor | <input type="checkbox"/> | <input type="checkbox"/> |

21. Are you currently under *H. pylori* eradication treatment such as proton pump inhibitors, antibiotics or bismuth ? Yes ☐ No ☐

22. Did you take any *H. pylori* eradication treatment such as proton pump inhibitors, antibiotics or bismuth for the last two weeks ? Yes ☐ No ☐
